# Direct Imaging and Identification of Proteoforms up to 70 kDa from Human Tissue

## Authors

Pei Su,<sup>1</sup> John P. McGee,<sup>1</sup> Kenneth R. Durbin,<sup>1</sup> Michael A. R. Hollas,<sup>1</sup> Manxi Yang,<sup>2</sup> Elizabeth K. Neumann,<sup>3</sup> Jamie L. Allen,<sup>3</sup> Bryon S. Drown,<sup>1</sup> Fatma Ayaloglu Butun,<sup>4</sup> Joseph B. Greer,<sup>1</sup> Bryan P. Early,<sup>1</sup> Ryan T. Fellers,<sup>1</sup> Jeffrey M. Spraggins,<sup>3,5</sup> Julia Laskin,<sup>2</sup> Jeannie M. Camarillo,<sup>1,4</sup> Jared O. Kafader,<sup>1,4</sup> and Neil L. Kelleher<sup>1,4,6\*</sup>

## Affiliations

<sup>1</sup>Departments of Molecular Biosciences, Chemistry, Chemical and Biological Engineering, and the Feinberg School of Medicine, Northwestern University, Evanston, IL, USA

<sup>2</sup>Department of Chemistry, Purdue University, West Lafayette, IN, USA

<sup>3</sup>Department of Biochemistry and Mass Spectrometry Research Center, Vanderbilt University, Nashville, TN, USA

<sup>4</sup>Proteomics Center of Excellence, Evanston, IL, USA

<sup>5</sup>Department of Chemistry, Cell and Development Biology, Vanderbilt University, Nashville, TN, USA

<sup>6</sup>Department of Biochemistry and Molecular Genetics, Feinberg School of Medicine, Northwestern University, Chicago, IL, USA

\*Correspondence to: Neil L Kelleher, [n-kelleher@northwestern.edu](mailto:n-kelleher@northwestern.edu) 2145 Sheridan Rd, Evanston, IL 60208

26 **Abstract**

27           Imaging of proteoforms in human tissues is hindered by low molecular specificity and  
28 limited proteome coverage. Here, we introduce proteoform imaging mass spectrometry (PiMS),  
29 which increases the size limit for proteoform detection and identification by 4-fold compared to  
30 reported methods, and reveals tissue localization of proteoforms at <80  $\mu\text{m}$  spatial resolution.  
31 PiMS advances proteoform imaging by combining liquid sampling (nanospray desorption  
32 electrospray ionization, nano-DESI) with ion detection using individual ion mass spectrometry  
33 ( $I^2\text{MS}$ ). We demonstrate the first proteoform imaging of human kidney, identifying 169 of 400  
34 proteoforms <70 kDa using top-down mass spectrometry and database lookup from the human  
35 proteoform atlas, including dozens of key enzymes in primary metabolism. Moreover, PiMS  
36 images visualize kidney anatomical structures and cellular neighborhoods in the vasculature  
37 versus the medulla or the cortex. The benefits of PiMS are poised to increase proteome coverage  
38 for label-free protein imaging of intact tissues.

39

40

41 **Teaser**

42 Nano-DESI combined with individual ion mass spectrometry generates images of proteoforms up  
43 to 70 kDa.

44

## 45 **Introduction**

46 Proteoforms are the protein-level products of gene expression and post-translational  
47 modifications functioning as key effectors in human health and disease (1, 2). In addition to  
48 understanding of their molecular compositions, interactions, and biological function,  
49 comprehensive characterization of the human proteoform landscape also requires mapping of  
50 their spatial distributions in human tissues and organs (3). Protein-level imaging using antibody-  
51 based optical microscopy has revealed distinct cell types, functional tissue units, and subcellular  
52 structures (4). These techniques employ enzymes and fluorophores as reporters to obtain high-  
53 resolution maps of protein targets in tissues (5). In recent years, highly multiplexed antibody-  
54 based imaging assays such as CODEX (6, 7), IBEX (8), and Cell-DIVE (9) has drastically  
55 increased the number of protein targets that can be probed in a single experiment. Alternatively,  
56 mass spectrometry (MS)-based imaging assays, including imaging mass cytometry (IMC) and  
57 multiplexed ion beam imaging (MIBI), utilize antibodies labeled with rare earth metals to detect  
58 protein localization for up to ~60 protein targets at once (10, 11). Despite the significant advances  
59 in spatial resolution and sensitivity, antibody-based approaches require prior knowledge of the  
60 protein targets and lack full molecular specificity like that provided by proteoform-level  
61 information (12, 13).

62 MS-based top-down proteomics (14, 15) has been widely used for proteoform  
63 characterizations (16). Modern MS instrumentation has reached the sensitivity for spatially-  
64 resolved top-down proteomics suitable for imaging experiments (17, 18). Matrix-assisted laser  
65 desorption/ionization (MALDI) is widely used for protein imaging (19, 20) due to the broad mass  
66 range to the sampling of the proteome (21-23). However, MALDI predominantly generates  
67 singly-charged ions, which gives limited fragment information for direct top-down identification  
68 of intact proteins (24). This challenge may be addressed using matrix-assisted laser desorption  
69 electrospray ionization (MALDESI), which combines MALDI with extractive ESI to generate

70 multiply-charged ions of peptides and proteins extracted from tissues (25). Alternatively,  
71 multiply-charged protein ions may be generated using liquid extraction-based ambient ionization  
72 methods (26) including desorption electrospray ionization (DESI) (27), liquid extraction surface  
73 analysis (LESA) (28), and nanospray desorption electrospray ionization (nano-DESI) (29). These  
74 techniques are particularly advantageous in top-down analysis of intact proteoforms in the  
75 imaging mode. Among these techniques, nano-DESI that utilizes a sub-nanoliter dynamic liquid  
76 bridge as a sampling probe enables imaging of biomolecules in tissues with a spatial resolution  
77 down to 10  $\mu\text{m}$  (30, 31).

78 One major challenge in proteoform imaging using liquid extraction-based techniques is  
79 the detection of low-abundance, high mass proteoforms in the congested MS spectra produced by  
80 ionizing complex mixtures of biomolecules extracted from the sample. Until now, imaging and  
81 identification of intact proteoforms directly from tissue has been limited to <20 kDa species (27,  
82 28, 32), with one report leading to the identification of subunits from a 43 kDa trimeric protein  
83 complex (33). Here, we address this challenge using individual ion mass spectrometry ( $I^2\text{MS}$ ).  
84  $I^2\text{MS}$  is a new, orbitrap-based charge detection technique (34-36) for single ion detection and  
85 results in a 500-fold improved sensitivity with a 10-fold higher resolving power with a high  
86 dynamic range (37). In particular, we combine nano-DESI ionization with  $I^2\text{MS}$  (37) to create  
87 proteoform imaging mass spectrometry (PiMS) for tissue imaging and direct identification of  
88 proteoforms up to ~70 kDa. We show isotopically-resolved proteoform assignment from human  
89 kidney and confidently identify proteoforms up to 53 kDa, illuminating differences in kidney  
90 architecture from the medulla, cortex, and vasculature. Incorporating  $I^2\text{MS}$ , PiMS yielded 169  
91 proteoform assignments/identifications at 80  $\mu\text{m}$  spatial resolution and demonstrates the potential  
92 to illuminate the proteinaceous structures comprising our tissues.

93

## 94 **Results**

### 95 *Overview of PiMS workflow*

96 Proteoform imaging mass spectrometry (PiMS) illustrated in Fig. 1 combines nanospray  
97 desorption electrospray ionization (nano-DESI) imaging with data acquisition and processing for  
98 individual ions. Specifically, we perform nano-DESI line scans on tissue, during which  
99 proteoforms were sampled as multiply-charged ions distributed across multiple charge states (Fig.  
100 1, top left). Instead of unresolved protein signals typically observed for ensembles of ions, we  
101 obtain charge-assigned individual protein ions from each pixel on the tissue section to allow for  
102 detection of proteoforms with resolution of their  $^{13}\text{C}$  isotopic peaks (Fig. S1). This allows for  
103 confident assignment of proteoform mass to  $<2$  parts-per-million at one sigma in each pixel of the  
104 imaging data (Fig. 1, middle left). Beyond proteoform-specific images (Fig. 1, bottom left),  
105 molecular identification is achieved using either direct top-down MS off the tissue (Fig. 1, top  
106 right) or database searching from known proteoforms at the intact masses (Fig. 1, bottom right).

107

### 108 *Human Kidney Proteoforms Detected by PiMS*

109 We used PiMS to examine the proteoforms and their localizations in a 10  $\mu\text{m}$ -thick human  
110 kidney tissue section. Encouragingly, we immediately expanded the mass detection range for  
111 proteoform imaging to  $>70$  kDa. Fig. 2A shows the full PiMS spectrum from 5-72 kDa from a  
112 sum of 16500 MS scans ( $\sim 8$  million single ions). This spectrum contains  $\sim 400$  proteoform masses  
113 above 0.1% relative abundance that are isotopically resolved. A complex group of proteoforms in  
114 the 68-80 kDa range were observed and not individually resolved (fig. S2). Spectral attributes  
115 include a dynamic range of  $\sim 200$  (using S/N 3 as the limit of detection) and a mass resolution  
116 ( $m/\Delta m$ ) of  $\sim 100,000$ . PiMS images can be constructed for any of the 242 proteoform masses with  
117 relative abundance above 1% in the full PiMS spectrum of Fig. 2A.

118 To identify these proteoforms, we manually annotated the full PiMS spectrum shown in  
119 Fig. 2A based off of the results from an intact mass tag (IMT) search against a custom database.  
120 In this approach, we compared the shape and mass accuracy of the isotopic distributions of the  
121 proteoforms in the PiMS spectrum with the theoretical proteoforms in the database. The database  
122 was constructed from the top 500 most abundant proteins identified in a bottom-up proteomics  
123 study of human kidney tissues (38). To maximize the number of proteoform identification, we  
124 combined additional matches from top-down identification (details discussed in the next section)  
125 and manually inspected post-translational modifications (PTMs) recorded in the Swiss-Prot  
126 database (38). As a result, we manually annotated 169 proteoforms in the entire mass range using  
127 a  $\pm 5$  ppm mass tolerance (list of proteoforms shown in table S1). Fig. 2D and 2E show two  
128 zoomed regions of the full PiMS spectrum with theoretical proteoform matches highlighted in  
129 color. Fig. 2D shows various unmodified proteoforms in the mass range of 22.2-22.7 kDa  
130 captured by the custom database, demonstrating that the search included a variety of proteins in  
131 the kidney proteome. The mass range of 41.4-42.1 kDa shown in Fig. 2E contains proteoforms of  
132 actin, cytoplasmic 2 (highlighted in pink) and 3-ketoacyl-CoA thiolase (highlighted in blue) with  
133 a few types of PTMs and their combinations. Aside from the monoacetylated + dimethylated  
134 proteoform of actin, cytoplasmic 2 identified by top-down MS, other modified proteoforms in the  
135 displayed mass range were manually annotated. Clearly, further investigation is needed to  
136 estimate the false discovery rate for automated identification in PiMS, including the use of  
137 Bayesian priors.

138 We annotated the most abundant proteins in Fig. 2A and Fig. 2B to demonstrate the  
139 portion of the human kidney proteome captured by PiMS. Not surprisingly, blood proteins  
140 (hemoglobin subunits, apolipoprotein A-1, and albumin, Fig. 2A) were found at highest  
141 abundance due to the highly vascularized nature of the kidney. Meanwhile, we captured many  
142 proteins prevalent in cellular pathways that are naturally abundant in human cells. In Fig. 2B, we

143 labeled the most abundant proteins to give a brief overview of the molecular functions and  
144 biological pathways observed in PiMS. From low to high mass range shown in Fig. 2B, we found  
145 molecular chaperone (alpha-crystallin B chain, CRYAB), signaling modulator  
146 (phosphatidylethanolamine-binding protein 1, PEBP1), proteins for cellular detoxification  
147 (superoxide dismutase [Mn], mitochondrial, SOD2, glutathione S-transferase A1&A2,  
148 GSTA1&GSTA2) and homeostasis (carbonic anhydrase 1&2), and structural proteins (actins,  
149 vimentin). Moreover, proteins participating in central metabolic pathways are dominant. In  
150 particular, we found key enzymes in Krebs cycle (malate dehydrogenase, MDH) and  
151 gluconeogenesis (fructose-1,6-bisphosphatase 1, FBP1), and 27 subunits of protein complexes in  
152 the electron transport chain of oxidative phosphorylation (blue asterisks for 6 subunits in 18-56  
153 kDa mass range, others recorded in table S1). More intriguingly, four key enzymes in glycolysis  
154 (triosephosphate isomerase, TPI, glyceraldehyde-3-phosphate dehydrogenase, GAPDH,  
155 phosphoglycerate kinase, PGK, and alpha-enolase, ENO) were captured (Fig. 2C, red asterisks in  
156 Fig. 2A and 2B). PiMS images of the four detected glycolytic enzymes were shown in Fig. 2C  
157 with largely even distributions across the entire tissue section spanning from the kidney medulla  
158 to the cortex, confirming the presence of glycolysis in nearly all kidney cell types. A more  
159 complete investigation of the biological pathways found in the 169 identified proteoforms were  
160 demonstrated by a Gene Ontology (GO) analysis shown in Fig. 2F, showing cellular metabolic  
161 processes as the predominant biological pathway observed in the PiMS experiment.

162

### 163 *Top-Down Characterizations of Kidney Proteoforms in PiMS*

164 Human kidney proteoforms were further identified and characterized using tandem MS  
165 (MS/MS). Direct fragmentation of protein ions >20 kDa is challenging due to the low abundance  
166 of their fragment ions, particularly larger ones (>15 kDa) that result from cleavage in the middle  
167 of the protein sequence (39). To overcome this limitation, we employed I<sup>2</sup>MS for the readout of

168 top-down fragmentation spectra to capture those large fragment ions typically buried under the  
169 noise level in ensemble MS/MS experiments (39). In particular, we selected 20-50 kDa  
170 proteoforms observed at >4% relative abundance for on-tissue MS/MS aiming for where they are  
171 in highest abundance on the tissue section. For each target proteoform, we selected a <0.8  $m/z$   
172 wide isolation window corresponding to the most abundant charge state of the proteoform  
173 obtained from PiMS data at MS<sup>1</sup>-level (Fig. 1, right and Materials and Methods section). By  
174 matching the originally observed intact mass with the subsequent fragmentation data, we  
175 confidently identified 21 proteoforms >20 kDa with E-values ranging from 10<sup>-12</sup> to 10<sup>-160</sup> (Table 1  
176 and fig. S7a-u).

177 In Fig. 3, we highlight two representative >20 kDa proteoforms confidently identified by  
178 MS/MS ( ) The 11-14.5 kDa region of the fragmentation spectrum of monoacetylated glutathione  
179 S-transferase A1 (GSTA1, 25,542 Da, Fig. 3A) contains abundant complementary fragments of a  
180 14-amino-acid-long sequence tag (B95-B108, Y113-Y126), contributing to the confident  
181 identification of this proteoform (Graphical Fragment Map, GFM, shown in Fig. 3A). PiMS  
182 image of GSTA1 proteoform in Fig. 3A show localization of this proteoform to the kidney cortex  
183 region. On the higher mass end, vimentin (53,530 Da) was also identified (fragment spectrum and  
184 GFM shown in Fig. 3B), with 63 isotopically-resolved >15 kDa fragment ions above 1% relative  
185 abundance matching sequence fragments of vimentin (a few representative ones shown in Fig.  
186 3B). PiMS image of vimentin (Fig. 3B) with localizations to the vasculature also confirms the  
187 identity of the proteoform.

188 At larger masses, identification of the proteoform by MS/MS is increasingly challenging.  
189 We obtained 3% sequence coverage for a proteoform of ~66.4 kDa, putatively identified as  
190 albumin (fig. S7t). Poor sequence coverage is likely due to presence of 17 disulfide linkages  
191 known to occur in albumin, thereby making PTM localization challenging. In one attempt to  
192 identify a proteoform centered at 70,900 Da, we found that the precursor proteoform with the best



193 database retrieval score was mesothelin isoform 2 (fig. S7u). The deviation in precursor mass  
194 (67,938 Da compared to 70,900 Da) may be attributed to modifications and/or isoform  
195 expression. Nevertheless, using top-down MS in PiMS, we were able to readily identify 21 human  
196 proteoforms ranging from 20 to 70 kDa in molecular mass.

### 198 *Creation of a Kidney Proteoform Map*

199 PiMS images allow for direct visualization of sub-mm anatomical structures and  
200 functional tissue units of human kidney sections with proteoform-level precision. PiMS of kidney  
201 tissue containing cortex, medulla, and vasculature regions shows distinct differences in the  
202 distribution of proteoforms across these vastly different anatomical regions (Fig. 4, optical image  
203 shown in Fig. 4A). The identification of kidney internal structures was supported by  
204 autofluorescence microscopy (Fig. 4B) (40) and periodic acid-Schiff (PAS) staining histology  
205 (Fig. 4C).

206 PiMS images of proteoforms in the kidney show distinct localizations (Fig. 4D-J).  
207 apolipoprotein A-1 (Fig. 4D) and GSTA2 (Fig. 4E) were found to be medulla-enriched and  
208 cortex-enriched proteoforms, respectively. Blood-abundant albumin (Fig. 4F) and alpha-crystallin  
209 B chain (Fig. 4G), a small heat shock protein, were ubiquitously expressed in most of the regions  
210 of the kidney, albeit at different relative abundances. Additionally, transgelin-2 (Fig. 4H) and  
211 vimentin (Fig. 4J) were found only abundant in highly-focused regions near the artery.

### 213 *Assessing Proteoform Biology: Differences in Space and Molecular Composition*

214 Next, we created composite PiMS proteoform images to enable more efficient readout of  
215 anatomical regions and functional tissue units in the kidney. Using the abovementioned single  
216 PiMS images, we created a series of tricolor composite PiMS images (Fig. 4K-M). By combining  
217 images of apolipoprotein A-1 (Fig. 4D, blue), GSTA2 (Fig. 4E, red) and albumin (Fig. 4F, green),

218 we highlighted vascular regions within the kidney (Fig. 4K, labeled as bulk vasculature). This  
219 confirms the highly vascularized inner medulla, along with distinct points of vascularization in  
220 the cortex aligning with glomeruli. Fig. 4L is a composite PiMS image of transgelin-2 (Fig. 4H),  
221 GSTA2 (Fig. 4E, blue) and alpha-crystallin B chain (Fig. 4G, red). Using this image, we highlight  
222 the large artery via the specific localization of transgelin-2 (Fig. 4L, green). Previous studies have  
223 shown the specific localization of transgelin-2 to the smooth muscle cells (SMCs). This  
224 observation is consistent with the abundance of SMC in arteries whereas veins are mainly  
225 comprised of stromal cells (41). Finally, the localization of vimentin (Fig. 4J, green) shows a  
226 more refined vasculature (Fig. 4M) when combined with GSTA2 (Fig. 4E, blue) and alpha-  
227 crystallin B chain (Fig. 4G, red). Vimentin is a filament protein found in most of the blood vessels  
228 and connective tissues. The localization of vimentin to the bulk blood vessel regions by PiMS  
229 confirms this. A majority of the scattered vimentin spots in the cortex fit well into the dark spots  
230 corresponding to glomeruli. Moreover, vimentin is found in many scattered locations in the inner  
231 medulla region. These illuminated spots correspond to the spatially-dispersed peritubular  
232 capillaries, which form a complex three-dimensional network in the medulla and become  
233 dispersed when the tissue is cross-sectioned.

234 Another major advantage of PiMS over antibody-based imaging approaches lies in the  
235 ability to determine the molecular composition of proteoforms in an untargeted fashion.  
236 Antibody-based imaging approaches do not distinguish different proteoforms of a single protein,  
237 whereas PiMS can capture sequence differences and modifications. Subtle differences of protein  
238 sequences and modifications become especially challenging to detect for high-mass proteins.  
239 Direct top-down identification of >20 kDa proteoforms from tissue enabled by PiMS allows for  
240 the characterization of highly similar kidney protein isoforms that originate from allelic coding  
241 single nucleotide polymorphisms (cSNPs).

242 Three major proteoforms of N-terminal acetylated GST subunits, GSTA1 and GSTA2,  
243 were observed in kidney tissue with localizations to the cortex region (Fig. 5B, 5D, and 5E). Fig.  
244 5C shows the mass domain spectrum of GSTA1 and GSTA2 proteoforms. A single proteoform  
245 was detected from GSTA1 (25,542 Da), showing two alleles with the same sequence. In contrast,  
246 we identified two GSTA2 proteoforms, the canonical form at 25,573 Da, and another form at  
247 25,587 Da representing a 14 Da mass shift. Both proteoforms were observed at similar  
248 abundances with highly similar tissue localization, which is characteristic of non-specific biallelic  
249 tissue expression resulting from a cSNP (Fig. 5D and 5E). Fragmentation data was able to localize  
250 this mass shift to the region between 110 and 113 from the N-terminus (regions highlighted in  
251 red, Fig. 5D and 5E and fig. S7d). A UniProt search shows a Ser111→Thr natural variant of  
252 GSTA2 (highlighted in blue), confirming that the 14 Da mass shift corresponds to a proteoform  
253 resulting from a common cSNP (allele frequency >40% according to dbSNP entry No.  
254 rs2180314). This exemplifies the power of PiMS to the probing of gene expression in tissues  
255 directly at the proteoform level, which is in necessity and complementary to genomic and  
256 transcriptomic predictions.

257

## 258 **Discussion**

259 Imaging methods have boomed in recent years. Highly multiplexed affinity reagent-based  
260 methods allow for the detection of more than 50 protein targets in a single assay (6). The  
261 increased throughput of these approaches has provided an opportunity to develop comprehensive  
262 maps of human tissues at a rapid pace. However, antibody-based imaging approaches do not  
263 distinguish different proteoforms of a single protein, whereas PiMS can capture kidney protein  
264 isoforms from different gene family members or allelic cSNPs. With the concept that proteoforms  
265 define cell types better than proteins (42), driving the spatial resolution of PiMS down to <10  $\mu$ M  
266 is a major goal to.

267 Moreover, PiMS presents low-bias to the protein masses compared to multiplex imaging  
268 assays, with the ability of capturing a majority of the abundant cytosolic proteins in cells. In fact,  
269 while performing IMT search of PiMS data against a database containing 100 most abundant  
270 proteins from bottom-up proteomics of human kidney tissue, 70 protein candidates were detected  
271 by PiMS. This provides an exceptional opportunity of using PiMS to delve into the abundant  
272 biological pathways in tissue in a spatially-resolved manner. In the Gene Ontology (GO) analysis  
273 result shown in Fig. 2F, a variety of central cellular metabolic pathways were found enriched in  
274 PiMS. Notably, we were able to detect and image four key enzymes in glycolysis and 27 subunits  
275 of the complexes in the respiratory electron transport chain, which are critical component of ATP  
276 metabolic process, the highest enriched pathway.

277 Another advantage of whole proteoform measurement is the robust detection of diverse  
278 types of post-translational modifications with low bias and knowledge of their stoichiometry. For  
279 example, two proteoforms of glyceraldehyde-3-phosphate dehydrogenase (GAPDH) were  
280 identified in the kidney dataset, both missing the start methionine and one containing a  
281 dimethylation site at Lys65. While both of these post-translational modifications are known (43,  
282 44), the dimethylation of Lys65 was shown to be very low in abundance and inconsistently  
283 observed (44). Our data indicates that the dimethylated proteoform is about ~5% of total GAPDH  
284 in human kidney. The function of the dimethylation is unknown, but its colocalization with the  
285 unmethylated proteoform suggests a possible role for the modification in the GAPDH  
286 dimerization or catalytic rate (45).

287 In conclusion, we present the PiMS approach that combines nano-DESI with  $I^2$ MS  
288 technology, which enables the direct imaging and molecular identification of human kidney  
289 proteoforms up to ~70 kDa. This approach increases observable masses by nearly 4-fold and  
290 resolving power by 10-fold compared to prior work (37). PiMS as a disseminatable imaging  
291 approach opens up exciting opportunities to infuse proteoform knowledge into the multi-omic

292 approaches being evaluated for inclusion into the Human Reference Atlas (46). By providing  
293 spatial localization of proteoforms to anatomical regions, cell types, and functional tissue units,  
294 PiMS promises applications molecular tissue mapping, biomarker discovery, and disease  
295 diagnostics.

296

## 297 **Materials and Methods**

### 298 *Tissue Preparation*

299 Human kidney tissue sections were prepared according to published protocols (47). Mouse  
300 brain tissue sections were sectioned at  $-21^{\circ}\text{C}$  to a  $12\ \mu\text{m}$  thickness using a CM1850 Cryostat  
301 (Leica Microsystems, Wetzlar, Germany). Tissue sections were thaw mounted onto glass  
302 microscope slides (IMEB, Inc Tek-Select Gold Series Microscope Slides, Clear Glass, Positive  
303 Charged) and stored at  $-80^{\circ}\text{C}$  before mass spectrometry imaging analysis.

304 Human kidney tissue sections were thawed under slight vacuum at room temperature, fixed  
305 and desalted via successive immersion in 70%/30%, 90%/10%, and 100%/0% ethanol/ $\text{H}_2\text{O}$   
306 solutions for 20 s each, delipidated by 99.8% chloroform for 60s, and dried under slight vacuum  
307 right before nano-DESI imaging experiments. These sample preparation steps allow for the *in situ*  
308 precipitation of proteins and removal of lipids avoiding suppression of protein signals upon  
309 ionization into the mass spectrometer (19, 48).

### 310 *Nano-DESI Ion Source*

311 A custom-designed nano-DESI source was used for all data acquisition. The experimental  
312 details of nano-DESI MSI have been described elsewhere (30, 31). Briefly, the nano-DESI probe  
313 is comprised of a primary (OD  $150\ \mu\text{m}$ , ID  $20\ \mu\text{m}$ ) and a nanospray capillary (OD  $150\ \mu\text{m}$ , ID  $40$   
314  $\mu\text{m}$ ) with the spray side of the nanospray capillary positioned close to the MS inlet. The probe  
315 was fabricated using fused silica capillary tubings (Molex, Thief River Falls, MN). A liquid  
316 bridge formed at the location where the two capillaries meet is brought into contact with the tissue

317 section for analyte extraction. The liquid bridge is dynamically maintained by solvent propulsion  
318 from the primary capillary and instantaneous vacuum aspiration through the nanospray capillary.  
319 The extracted analytes are continuously transferred to a mass spectrometer inlet and ionized by  
320 ESI. Imaging experiments are performed by moving the sample under the nano-DESI probe in  
321 lines. The optimal scan rate is discussed in the next section. The strip step between the line scans  
322 was set to 150  $\mu\text{m}$  to avoid overlap between the adjacent line scans. To ensure the stability of the  
323 nano-DESI probe during the imaging experiment, we applied a surface tilt angle correction to the  
324 tissue sample by defining a three-point plane prior to the imaging experiment (49). All samples  
325 were electrosprayed under denaturing conditions in a 60%/39.4% acetonitrile/water and 0.6%  
326 acetic acid solution compatible with both protein extraction and ionization. All the experiments  
327 were performed in positive ionization mode. The source conditions on the mass spectrometer  
328 were set as follows: ESI voltage: 3 kV; in-source CID: 15 eV; S-lens RF level: 70%; capillary  
329 temperature: 325  $^{\circ}\text{C}$ .

### 330 *PiMS Conditions and Data Acquisition*

331 PiMS data acquisition was performed in the individual ion mass spectrometry ( $I^2\text{MS}$ ) mode  
332 which has been described previously on a Q-Exactive Plus Orbitrap mass spectrometer (Thermo  
333 Fisher Scientific, Bremen, Germany, fig. S1) (37). In particular, rather than collecting typical  
334 ensemble ion MS spectra, ion signals were attenuated down to the individual ion regime by  
335 limiting the ion collection time in the C-trap before injection into the Orbitrap analyzer. The MS  
336 acquisition rate was set at 1 scan every 2 s. During PiMS data acquisition, proteoforms were  
337 sampled by a nano-DESI probe producing multiply-charged ions distributed across multiple  
338 charge states. To enable downstream  $I^2\text{MS}$  analysis, the majority of ions in one detection period  
339 was collected in the individual ion regime, corresponding to a singular ion signal at a defined  $m/z$   
340 (or frequency) value. In particular, rastering line scans on tissue were performed at a reduced rate  
341 of 2.5-4  $\mu\text{m}/\text{s}$ , which corresponds to a 5-8  $\mu\text{m}$  sampling distance between adjacent pixels. The

342 nano-DESI solvent flow rate was kept at 600 nL/s to allow for efficient extraction and dilution of  
343 the proteins. The injection time for a specific set of tissue sections is typically optimized by  
344 acquiring line scans on an adjacent section prior to an imaging experiment, and it may vary from  
345 100 to 500 ms. For 10  $\mu\text{m}$  thin sections of human kidney tissue presented in this study, a 300 ms  
346 injection time was employed for all the sections from the same subject. We note that for  
347 extremely dominant proteoforms (e.g., hemoglobin subunits in this study), “multiple ion events”  
348 were commonly observed. The strip step between the line scans was set to 150  $\mu\text{m}$  to avoid  
349 overlap between the adjacent line scans.

350 Additional MS instrument conditions in the PiMS experiment are mentioned here: the  
351 Orbitrap central electrode voltage was adjusted to -1 kV to improve the ion survival rate under  
352 denatured conditions. HCD pressure level was kept at 0.2 (UHV pressure  $< 2 \times 10^{-11}$  Torr) to  
353 reduce collision-induced ion decay within the Orbitrap analyzer without completely losing the ion  
354 signal. Additional relevant data acquisition parameters were adjusted as follows: mass range: 400-  
355 2500  $m/z$ ; AGC mode was disabled and the maximum injection time was held constant at 300 ms;  
356 enhanced Fourier transform: off; averaging: 0; microscans: 1. Time-domain data files were  
357 acquired at detected ion frequencies and recorded as Selective Temporal Overview of Resonant  
358 Ions (STORI) files (50). STORI enabled: Enabled.

### 359 *PiMS Data Analysis & Image Generation*

360 Ion images were generated using a MATLAB script developed in-house. Mass-domain  
361 spectra were constructed by co-adding all individual ions obtained from the entire tissue section.  
362 In specific cases where computation power was limited, charge assignment and image  
363 construction were performed in sections with an upper limit of 50 million ions per portion. In the  
364 first step, all ion signals were subjected to STORI analysis to filter out decayed and multiple ion  
365 events. The neutral masses of the protein ions were calculated by:

$$Mass = \left(\frac{m}{z} \times z\right) - (z \times M_{proton})$$

366 Charge state ( $z$ ) is obtained from the slope of induced image current determined by the STORI  
367 analysis (50). Accurate charge assignment of each ion was statistically evaluated by comparing  
368 the slopes of its isotopologues across different charge states from the entire tissue section. In  
369 particular, an iterative voting methodology was employed for filtering out ions with a lower  
370 probability score in the process, which allows for the construction of mass-domain isotopic  
371 distribution of a proteoform with statistical confidence. In this step, we utilized a Kernel Density  
372 Estimation (KDE) approach to convert centroid masses of individual ions to uniform  
373 distributions. Accurate masses of the isotopes were obtained from the center of the summed  
374 individual ion profiles.

375 For image generation, ions composing the mass-domain isotopic envelope of a protein were  
376 registered back to their spatial origins on the tissue section for PiMS image generation. A  $\pm 10$   
377 ppm isotopic mass tolerance was used to select individual ions for image generation. A raw image  
378 was first generated using absolute ion counts at different x-y locations. In the kidney PiMS  
379 images presented in this study, each pixel was constructed from three adjacent MS scans  
380 corresponding to  $\sim 10 \mu\text{m} \times 150 \mu\text{m}$  area. The raw image was normalized using a total ion count  
381 matrix, which accounts for the fluctuation of sampling conditions at different locations.

### 382 *Intact Mass Tag (IMT) Search & Gene Ontology (GO) analysis*

383 The summed mass-domain PiMS spectrum was converted to *.mzML* format and processed  
384 using a custom version of TD Validator (Proteinaceous, Evanston, IL) implemented with an MS<sup>1</sup>  
385 IMT search function. The PiMS spectrum was shifted by +4 ppm according to the accurate  
386 masses of six MS/MS identified proteoforms in the 20-50 kDa mass range. A human protein  
387 database constructed from top 500 most abundant proteins in a bottom-up proteomics study of  
388 human kidney tissues was used for the search (Table S2). Methionine on/off and monoacetylation



389 were considered as possible proteoform modifications in the database. IMT search was performed  
390 with a  $\pm 5$  ppm mass tolerance. Additional proteoform matches were curated by spectrum  
391 inspection and manual annotation of putative modifications recorded in Swiss-Prot human  
392 proteome database. The final 169 proteoform matches include MS/MS-identified proteoforms and  
393 all IMT-identified proteoforms discussed above.

394 Gene Ontology (GO) analysis was performed using Metascape (<https://metascape.org/>)  
395 (51). Specifically, a list of Entrez Gene ID was retrieved for the 169 identified proteoforms on  
396 Uniprot and submitted to Metascape for GO analysis. The result contains the top-level GO  
397 biological processes.

#### 398 *On-tissue top-down proteomics data analysis*

399 Targeted MS/MS experiments were performed on a tissue section adjacent to the imaged  
400 section using higher-energy collisional dissociation (HCD). In the first step, a target proteoform  
401 was selected in the mass-domain spectrum. We utilized the PiMS image of the target proteoform  
402 to select a target area on the section where the proteoform abundance is enhanced. For the  
403 selected area, the mass-domain PiMS spectrum was convoluted back to  $m/z$  domain, from which a  
404 proper isolation window that contains predominantly the target proteoform was selected. A 0.8  
405  $m/z$  isolation window was typically employed for most of the targets; in special cases, 0.5-0.6  $m/z$   
406 window was used to avoid overlapping signal. MS/MS experiments were performed by scanning  
407 the nano-DESI probe over the selected region with the selected isolation window at 2.5-4  $\mu\text{m/s}$   
408 scan rate. MS/MS data acquisition was conducted in the  $I^2\text{MS}$  mode with an Orbitrap detection  
409 period of 2 s (HCD pressure setting = 0.5) (39). HCD collision energy and injection time was  
410 optimized to maximize the population of individual ion fragments. Typical ranges of collision  
411 energy and injection time used in this study were 7-14 eV and 200-1500 ms, respectively. Total  
412 data acquisition time for each target varied from 1-5 hours.

413 MS/MS data was first subjected to  $I^2MS$  processing for fragment ion charge assignment  
414 and mass-domain spectrum construction following the same procedure as described above. Mass-  
415 domain spectrum was converted to *.mzML* format subjected to  $MS^2$  search function implemented  
416 in ProSight Native (Proteinaceous, Evanston, IL) to look for possible candidates from the entire  
417 human protein database. For each search, the top 1-5 candidates were manually validated using a  
418 custom version of TDValidator (Proteinaceous, Evanston, IL) to identify the best matching  
419 proteoform. Proteoform E-values were obtained from ProSight Native and TD Validator reports.

420 **Acknowledgments**

421 **Funding:**

422 National Institutes of Health UH3 CA246635 (NLK)

423 National Institutes of Health P41 GM108569 (NLK)

424 National Institutes of Health P30 DA018310 (NLK)

425 National Institutes of Health P30 CA060553 (awarded to the Robert H. Lurie  
426 Comprehensive Cancer Center)

427 National Institutes of Health UH3CA255132 (JL)

428 National Institutes of Health U54DK120058 (JMS)

429 National Institute of Environmental Health Sciences T32ES007028 (EKN).

430 NIH National Cancer Institute 5 UM1 CA183727-08 (Cooperative Human Tissue  
431 Network at Vanderbilt University Medical Center).

432 **Author contributions:**

433 Conceptualization: PS, JMC, JOK, NLK

434 Methodology: PS, MY, FAB, JOK, JL, NLK

435 Resources: MY, EKN, JLA

436 Software: KRD, MARH, JBG, BPE, RTF

437 Investigation: PS, EKN, FAB

438 Visualization: PS, JPM, KRD, MARH, JBG, BPE, JOK

439 Supervision: JMC, JOK, NLK

440 Writing—original draft: PS, JMC, NLK

441 Writing—review & editing: PS, JPM, KRB, MARH, MY, EKN, JLA, BSD, FAB,  
442 JBG, BPE, RTF, JMC, JOK, JMS, JL, NLK

443 **Competing interests:**

N.L.K., K.R.D, and J.O.K. report a conflict of interest with  $I^2MS$  technology, currently being commercialized by Thermo Fisher Scientific.

### Data and materials availability:

Custom compiled code used to process and create  $I^2MS$  files is already available (52). Additional software and data that support the findings of this study are available from the corresponding authors upon request.

## Figures and Tables

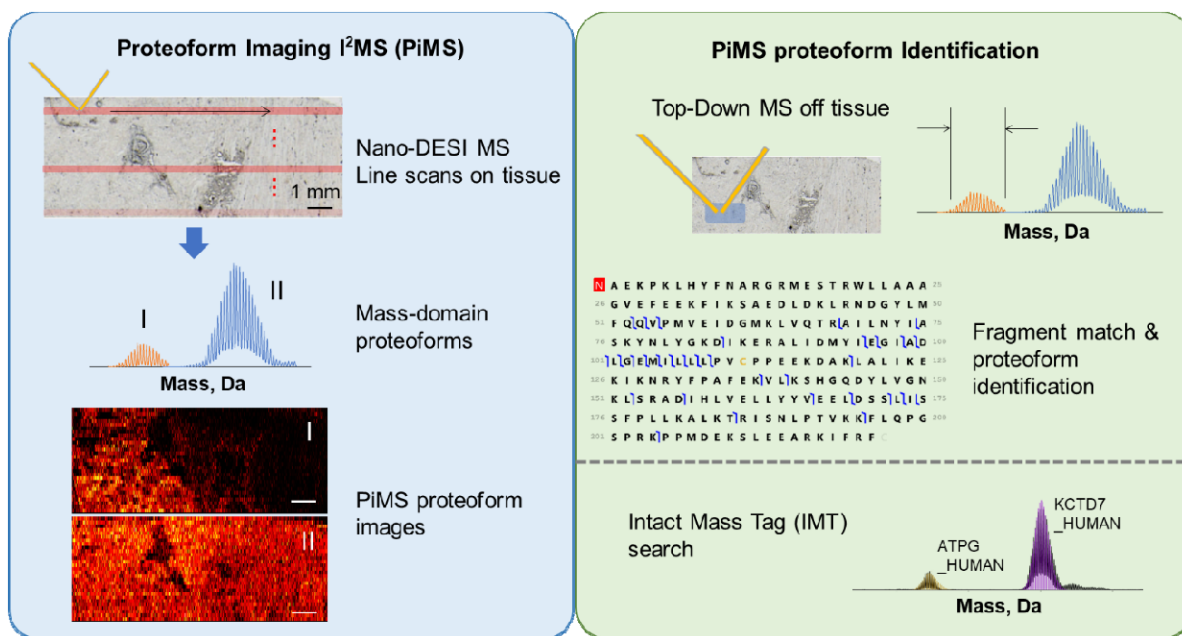

**Fig. 1. Illustration of the PiMS workflow for proteoform imaging and identification.** The left panel shows the scanning approach (top), detection of proteoforms in the mass domain (middle) and image reconstruction (bottom). The right panel depicts the two approaches to identify proteoforms using either direct fragmentation of proteoform ions and spectral readout by individual ion MS/MS (top) or database lookup of accurate mass values (IMT, bottom).

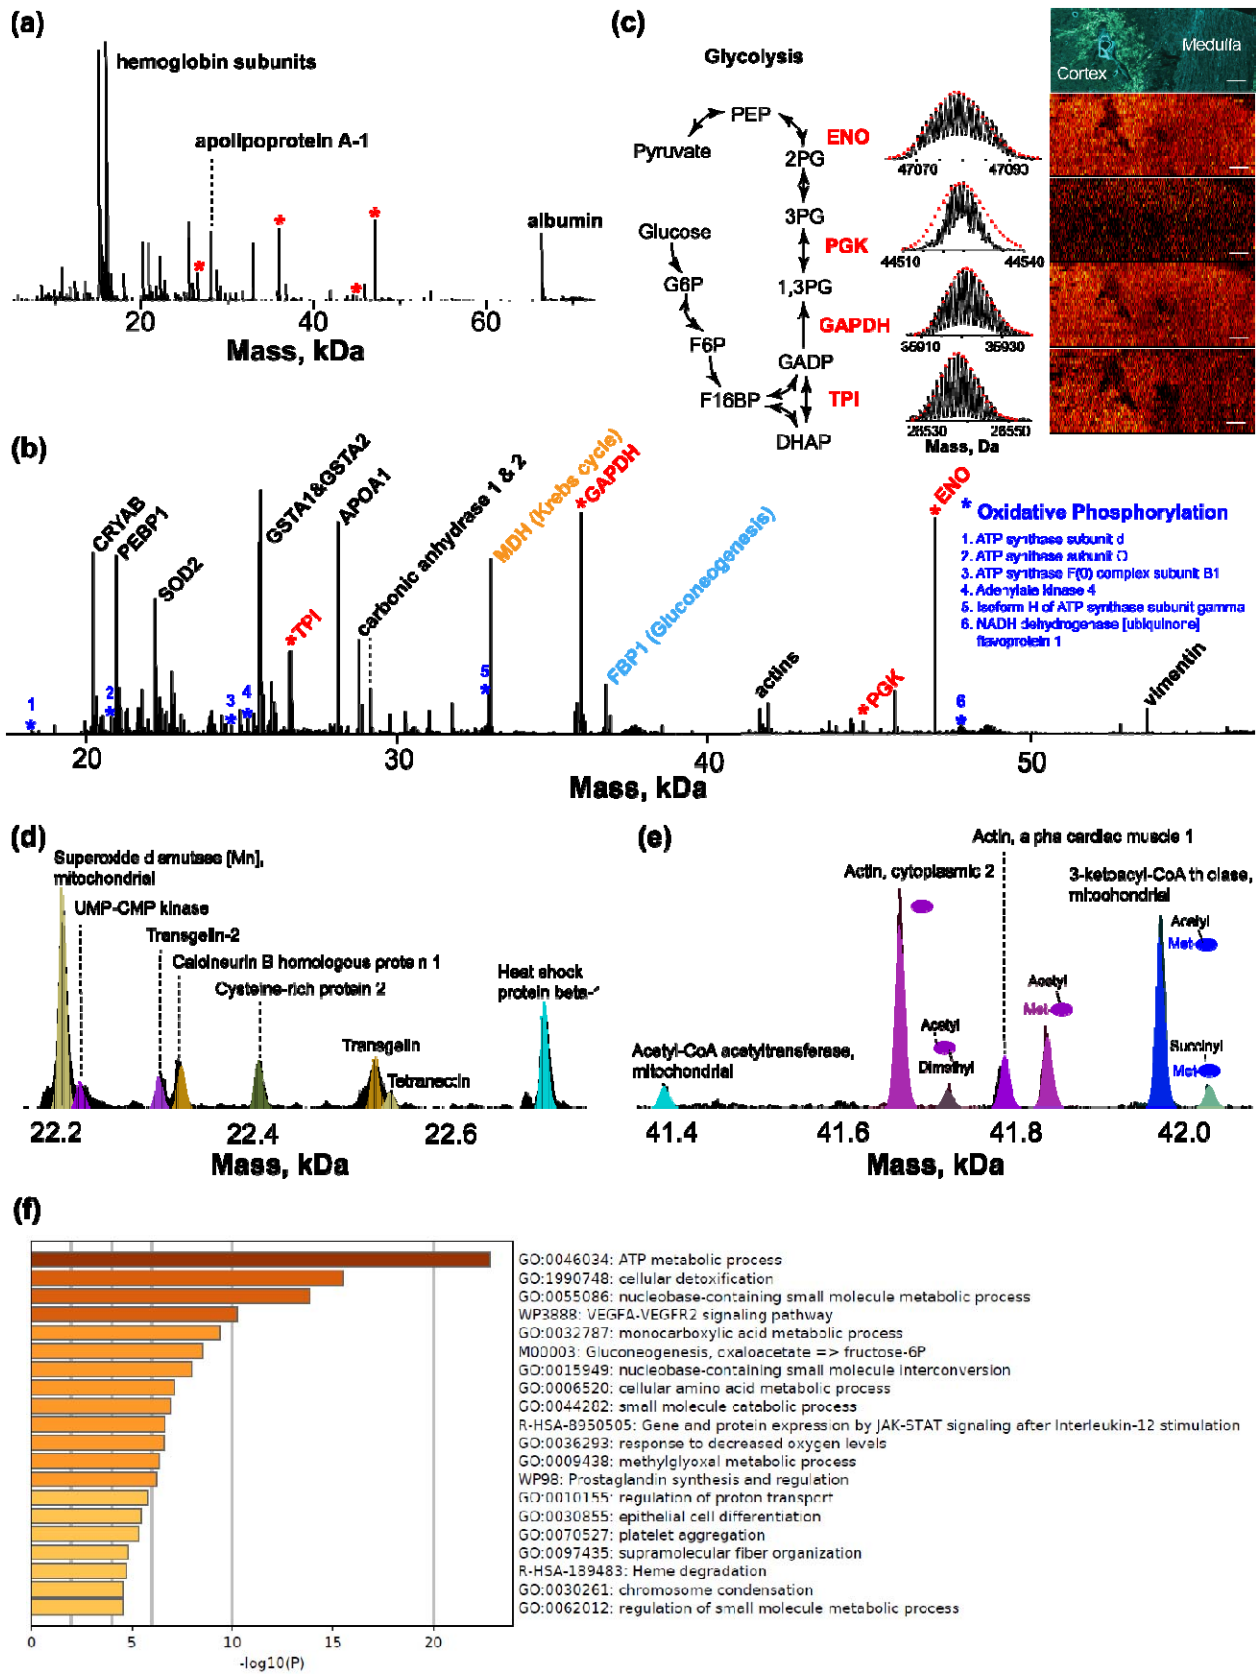

459

460

461

**Fig. 2.** Sum of mass domain spectrum obtained from PiMS of human kidney. (a) Full scale PiMS spectrum in 5-72 kDa summed from 16700 MS scans; regions occupied by abundant blood

462 proteins (hemoglobin subunits, albumin) are labeled in the spectrum; red asterisks denote the key  
463 glycolytic enzymes found in the spectrum. (b) PiMS full spectrum in the 18-56 kDa range  
464 zoomed in from (a); major proteins identified using a variety of approaches are labeled in the  
465 spectrum; aside from glycolytic enzymes (red asterisks), enzymes involved in a few other major  
466 metabolic pathways (Krebs cycle, gluconeogenesis, oxidative phosphorylation) found in PiMS are  
467 labeled in the spectrum. (c) Theoretical (red triangles) and experimentally-observed (black trace)  
468 isotopic distributions of the four glycolytic enzymes (labeled with red asterisks in (a) and (b))  
469 together with their PiMS images depicted in a schematic diagram of the glycolysis metabolic  
470 pathway. The cortex and the medulla of the kidney section imaged are labeled in the  
471 autofluorescence image at top. Scale bar: 1 mm. Selected mass range of 22.2-22.7 kDa (d) and  
472 41.4-42.1 kDa (e) showing identified proteoforms (spectrum in black, theoretical isotopic  
473 distributions in color). (f) GO analysis of biological pathways found enriched in the 169 identified  
474 proteoforms from the PiMS experiment shown in the  $-\log_{10}(P)$  scale.

475

476

477

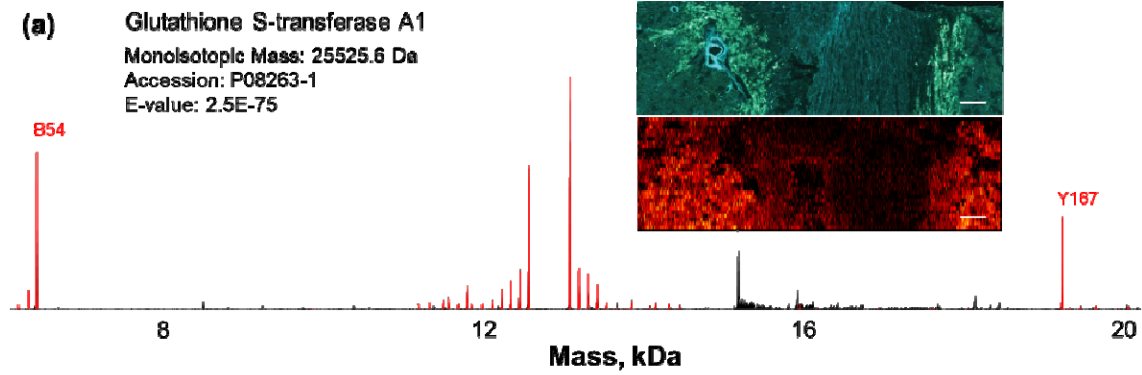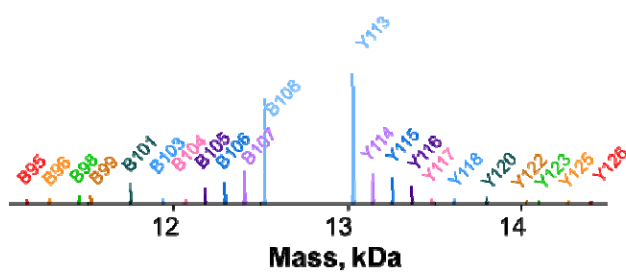

```

N A E K P K L H Y F N A R G R M E S T R W L L A A A
    G V E F E E K F I K S A E D L D K L R N D G Y L M
    F Q L V L P M V E I D G M K L Y Q T R A I L N Y I L A
    S K Y N L Y G K D I K E R A L I D M Y I L E G I L A D
    L L G E M L I L L L L P V C P P E E K D A K L A L I K E
    K I K N R Y F P A F E K V L K S H G Q D Y L V G N
    K L S R A D I H L V E L L Y Y V E E L D S S L I S
    S F P L L K A L K T R I S N L P T V K K F L Q P G
    S P R K P P M D E K S L E E A R K I F R F
    
```

478

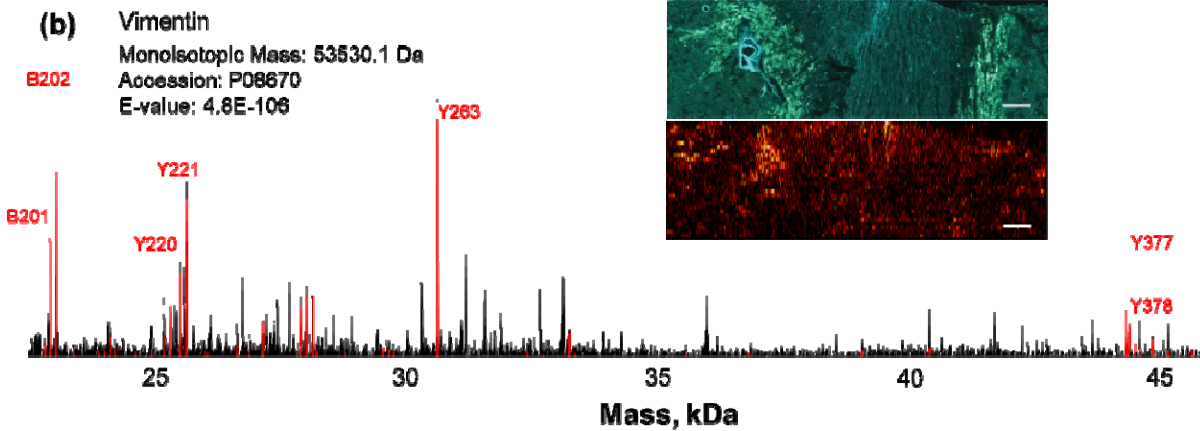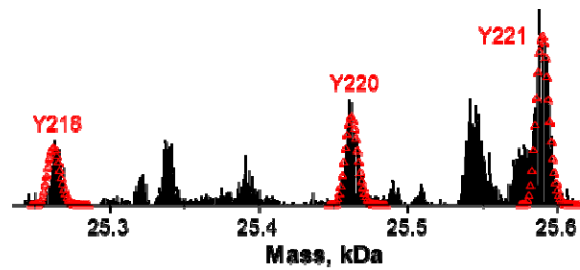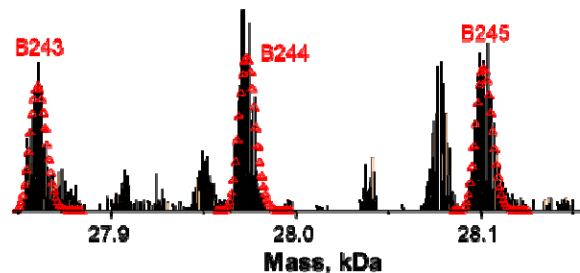

```

N S T R S V S S S S Y R R M F G L P G T A L S R P S S
    I S R S Y V T T S T R T Y S L G S A L R P S T S R I S
    L Y A S S L P G G V Y A L T R S L S A V R L R S S V I P G
    V R L L Q D S V D F S L L A D A I N T E F K N T R T
    N E K I V E L Q E L N D R F A N Y I D K V R F L E Q
    Q N K I L L A E L B Q L K G Q G K S R L G D L Y E
    E E M R E L R R Q V D Q L T N D K A R V E V E R D
    N L A E D I M R L R E K L Q E E M L Q R E E A E N
    T I L Q S F R Q D V D N A S L A R L D L E R K V E S
    L Q E E I A F L K K L H E E E I Q E L I Q A Q I Q E
    Q H V Q I D V D V L S K F D L T A A L R D V R Q Y
    E S V A A K N L Q E A E E W Y K S K F A D L S E A
    A N R N D A L R Q A K Q E S T E Y R R Q V Q S L
    T C I E V D A L K G T N E S L E R Q M R E M E N F
    I A V E A A N Y Q D T I G R L Q D E I Q N M K E E M
    A R H L R E Y Q D L L N V K M A L D I E I A T Y R
    K L L E G E S R I S L P L P N F S S L N L R E T
    N I D S L P L V D T H S K R T L L I K T V E T R D
    G Q V I N E T S Q H H D D L E
    
```

479

480 **Fig. 3. On-tissue identification of proteoforms by MS/MS.** Two representative human kidney  
481 proteoforms, glutathione S-transferase A1 (a) and vimentin (b). The PiMS images of the two  
482 proteoforms are shown on the top right of each panel along with an autofluorescence image of an  
483 adjacent section as a reference. On the bottom left of each panel, expanded regions of the  
484 fragment spectrum are displayed with the major matching fragment ions annotated. GFMs are  
485 shown on the bottom right of each panel. Scale bar: 1 mm.

486

487



488

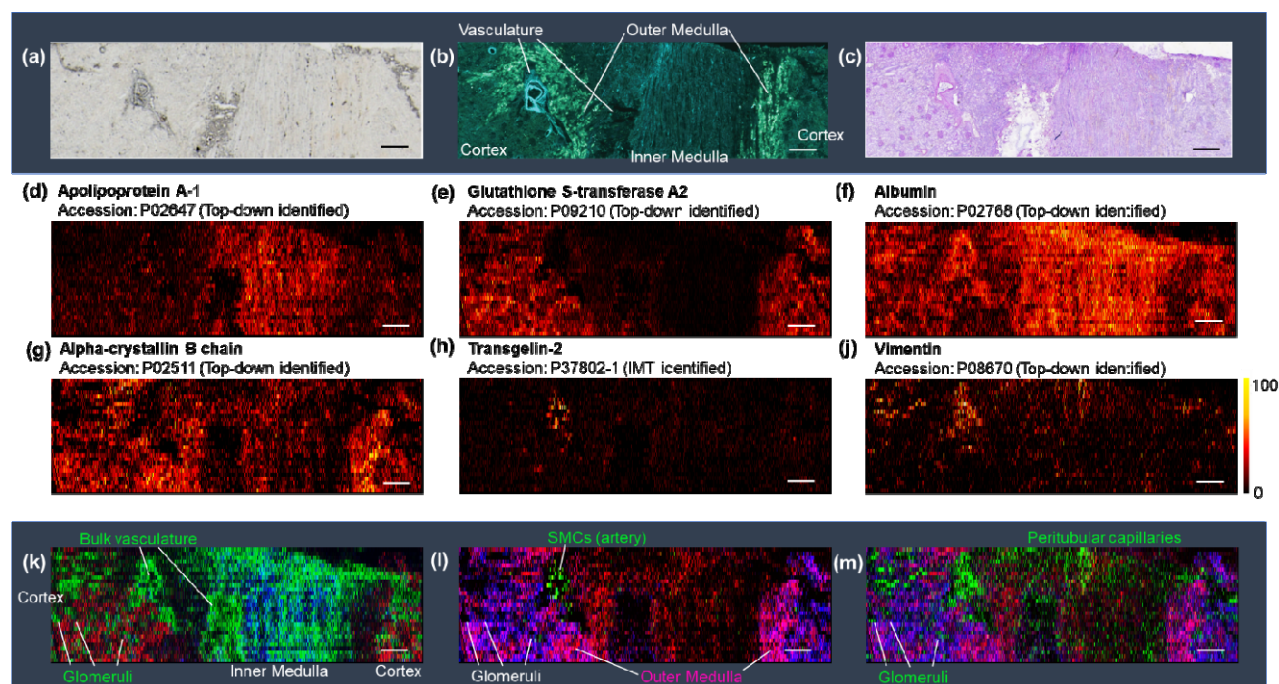

489

490

491

492

493

494

495

496

497

498

499

500

**Fig. 4. Kidney Proteoform Maps.** Optical (a) and autofluorescence (b) images of adjacent human kidney sections containing the cortex, medulla, and vasculature regions; (c) PAS staining of an adjacent section from the same kidney; (d)-(j) PiMS images of individual proteoforms that selectively illuminate different anatomical regions and cellular neighborhoods, the name and UniProt accession of the proteoforms are depicted next to the images with their color scale. Composite image of (k) apolipoprotein A-1 (blue), glutathione S-transferase A2 (red), and albumin (green); (l) glutathione S-transferase A2 (blue), alpha-crystallin B chain (red), and Transgelin-2 (green); and (m) glutathione S-transferase A2 (blue), alpha-crystallin B chain (red), and vimentin (green). Scale bar: 1 mm.

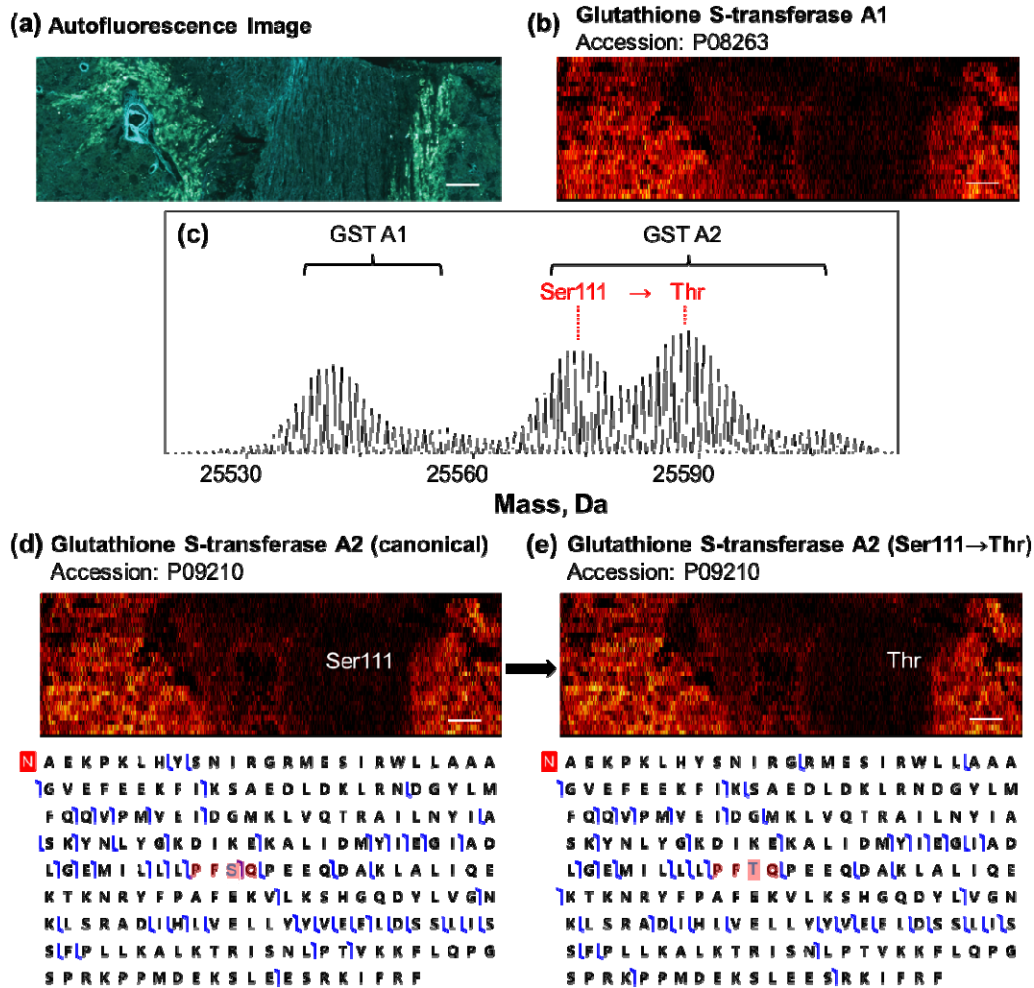

501

502 **Fig. 5. Mass spectrometric detection of gene differences.** (a) Autofluorescence and PiMS  
 503 images of alpha GST enzymes of the human kidney section (b, d, and e). Mass domain PiMS  
 504 spectra of ~25.6 kDa range (c) shows GSTA1 & GSTA2 enzyme proteoforms. The GFM of the  
 505 two proteoforms of GSTA2 from a known biallelic cSNP are shown in (d) and (e) below the  
 506 PiMS images. The sequence variation of the two cSNP GSTA2 proteoforms are highlighted in the  
 507 GFMs in blue.

508

**Table 1. Proteoforms identified by on-tissue MS/MS.**

| Protein description                                 | Gene   | Accession | PFR             | Observed mass |
|-----------------------------------------------------|--------|-----------|-----------------|---------------|
| Alpha-crystallin B chain                            | CRYAB  | P02511    | PFR00000325920  | 20200.47      |
| Superoxide dismutase [Mn], mitochondrial            | SOD2   | P04179-1  | PFR00000001332  | 22204.25      |
| Membrane-spanning 4-domains subfamily A member 4A   | M4A4A  | Q96JQ5    | N/A             | 25431.57      |
| Glutathione S-transferase A1                        | GSTA1  | P08263-1  | N/A             | 25540.66      |
| Glutathione S-transferase A2                        | GSTA2  | P09210    | PFR00000432952  | 25573.626     |
| Glutathione S-transferase A2                        | GSTA2  | P09210    | N/A             | 25587.64      |
| V-type proton ATPase subunit E 1                    | VATE1  | P36543-1  | PFR00000053332  | 26055.743     |
| Apolipoprotein A-1                                  | APOA1  | P02647    | N/A             | 28078.5       |
| Adaptin ear-binding coat-associated protein 1       | NECAP1 | Q8NC96-1  | N/A             | 29764.03      |
| N(G),N(G)-dimethylarginine dimethylaminohydrolase 1 | DDAH1  | O94760    | PFR00000058601  | 31031.95      |
| Malate dehydrogenase, mitochondrial                 | MMDHM  | P40926-1  | PFR00000002776  | 32999.46      |
| Glyceraldehyde-3-phosphate dehydrogenase            | GAPDH  | P04406-1  | PFR00000001134  | 35921.4       |
| Glyceraldehyde-3-phosphate dehydrogenase            | GAPDH  | P04406-1  | PFR00000001124  | 35950.39      |
| Fructose-1,6-bisphosphatase 1                       | FBP1   | P09467    | PFR000006225388 | 36724.76      |
| Actin, cytoplasmic 2                                | ACTG1  | P63261    | PFR00000001511  | 41660.74      |
| Actin, cytoplasmic 1                                | ACTB   | P60709    | N/A             | 41660.74      |
| Actin, cytoplasmic 2                                | ACTG1  | P63261    | N/A             | 41716.67      |
| Alpha-enolase                                       | ENOA   | P06733    | PFR00000001065  | 47078.34      |
| Vimentin                                            | VIME   | P08670    | PFR00000001800  | 53561.13      |
| Albumin                                             | ALBU   | P02768    | N/A             | 66438.68      |
| Mesothelin                                          | MSLN   | Q13421-3  | N/A             | 70900.52      |

| Theoretical mass | Mass accuracy, ppm | Sequence coverage | E-value   | Modifications                             |
|------------------|--------------------|-------------------|-----------|-------------------------------------------|
| 20200.46         | 0.50               | 35%               | 1.06E-131 | Acetyl@N                                  |
| 22204.27         | 0.90               | 16%               | 2.08E-58  | truncation 1-24                           |
| 25431.5          | 2.75               | 4%                | 2.66E-12  | Met-off, acetyl@N, phosphoryl@S           |
| 25540.67         | 0.39               | 15%               | 2.50E-75  | Met-off, acetyl@N                         |
| 25573.63         | 0.16               | 17%               | 1.38E-57  | Met-off, acetyl@N                         |
| 25587.64         | 0.00               | 20%               | 8.64E-87  | Met-off, acetyl@N, 114 S to T             |
| 26055.77         | 1.04               | 14%               | 4.16E-54  | 2-225, alpha-amino acetylated residue@N   |
| 28078.53         | 1.07               | 17%               | 1.70E-65  | Truncation 24-266                         |
| 29764.21         | 6.05               | 18%               | 3.52E-75  | Omega-N-methyl@R180, methyl@N             |
| 31031.95         | 0.00               | 16%               | 1.28E-74  | Met-off, acetyl@N                         |
| 32999.49         | 0.91               | 18%               | 6.08E-94  | Truncation 1-24                           |
| 35921.41         | 0.28               | 14%               | 4.48E-76  | Met-off                                   |
| 35950.07         | 8.90               | 14%               | 8.64E-63  | Met-off, dimethyl@K65                     |
| 36724.82         | 1.63               | 22%               | 1.12E-121 | Met-off, acetyl@N, 217 R to K             |
| 41660.82         | 1.92               | 24%               | 1.12E-154 | Met-off                                   |
| 41660.78         | 0.96               | 24%               | 3.84E-160 | Met-off, acetyl@N, methyl@H72             |
| 41716.84         | 4.08               | 20%               | 1.73E-115 | Met-off, acetyl@N, methyl@H72/K83         |
| 47078.36         | 0.42               | 12%               | 1.60E-74  | Met-off, acetyl@N                         |
| 53561.13         | 0.00               | 16%               | 4.80E-106 | Met-off, acetyl@N                         |
| 66438.78         | 1.51               | 3%                | 8.32E-22  | Truncation 1-24, disulfide bonds all Cys, |
| 67980.42         | N/A                | 7%                | 1.60E-45  | Met-off, acetyl@N                         |

## 511 References

512

- 513 1. M.-S. Kim, S. M. Pinto, D. Getnet, R. S. Nirujogi, S. S. Manda, R. Chaerkady, A. K.  
514 Madugundu, D. S. Kelkar, R. Isserlin, S. Jain, J. K. Thomas, B. Muthusamy, P. Leal-  
515 Rojas, P. Kumar, N. A. Sahasrabudde, L. Balakrishnan, J. Advani, B. George, S. Renuse,  
516 L. D. N. Selvan, A. H. Patil, V. Nanjappa, A. Radhakrishnan, S. Prasad, T. Subbannayya,  
517 R. Raju, M. Kumar, S. K. Sreenivasamurthy, A. Marimuthu, G. J. Sathe, S. Chavan, K. K.  
518 Datta, Y. Subbannayya, A. Sahu, S. D. Yelamanchi, S. Jayaram, P. Rajagopalan, J.  
519 Sharma, K. R. Murthy, N. Syed, R. Goel, A. A. Khan, S. Ahmad, G. Dey, K. Mudgal, A.  
520 Chatterjee, T.-C. Huang, J. Zhong, X. Wu, P. G. Shaw, D. Freed, M. S. Zahari, K. K.  
521 Mukherjee, S. Shankar, A. Mahadevan, H. Lam, C. J. Mitchell, S. K. Shankar, P.  
522 Satishchandra, J. T. Schroeder, R. Sirdeshmukh, A. Maitra, S. D. Leach, C. G. Drake, M.  
523 K. Halushka, T. S. K. Prasad, R. H. Hruban, C. L. Kerr, G. D. Bader, C. A. Iacobuzio-  
524 Donahue, H. Gowda, A. Pandey, A draft map of the human proteome. *Nature* **509**, 575-  
525 581 (2014).
- 526 2. N. L. Anderson, A. D. Matheson, S. Steiner, Proteomics: applications in basic and applied  
527 biology. *Current Opinion in Biotechnology* **11**, 408-412 (2000).
- 528 3. M. Uhlén, L. Fagerberg, B. M. Hallström, C. Lindskog, P. Oksvold, A. Mardinoglu, Å.  
529 Sivertsson, C. Kampf, E. Sjöstedt, A. Asplund, Tissue-based map of the human proteome.  
530 *Science* **347**, (2015).
- 531 4. S. K. Saka, Y. Wang, J. Y. Kishi, A. Zhu, Y. Zeng, W. Xie, K. Kirli, C. Yapp, M.  
532 Cicconet, B. J. Believeau, S. W. Lapan, S. Yin, M. Lin, E. S. Boyden, P. S. Kaeser, G.  
533 Pihan, G. M. Church, P. Yin, Immuno-SABER enables highly multiplexed and amplified  
534 protein imaging in tissues. *Nat. Biotechnol.* **37**, 1080-1090 (2019).
- 535 5. E. Lundberg, G. H. H. Borner, Spatial proteomics: a powerful discovery tool for cell  
536 biology. *Nat. Rev. Mol. Cell Biol.* **20**, 285-302 (2019).
- 537 6. Y. Goltsev, N. Samusik, J. Kennedy-Darling, S. Bhate, M. Hale, G. Vazquez, S. Black, G.  
538 P. Nolan, Deep Profiling of Mouse Splenic Architecture with CODEX Multiplexed  
539 Imaging. *Cell* **174**, 968-981.e915 (2018).
- 540 7. E. K. Neumann, N. H. Patterson, E. S. Rivera, J. L. Allen, M. Brewer, M. P. deCaestecker,  
541 R. M. Caprioli, A. B. Fogo, J. M. Spraggins, Highly multiplexed immunofluorescence of  
542 the human kidney using co-detection by indexing. *Kidney International*, (2021).
- 543 8. A. J. Radtke, E. Kandov, B. Lowekamp, E. Speranza, C. J. Chu, A. Gola, N. Thakur, R.  
544 Shih, L. Yao, Z. R. Yaniv, R. T. Beuschel, J. Kabat, J. Croteau, J. Davis, J. M. Hernandez,  
545 R. N. Germain, IBEX: A versatile multiplex optical imaging approach for deep  
546 phenotyping and spatial analysis of cells in complex tissues. *Proceedings of the National*  
547 *Academy of Sciences* **117**, 33455 (2020).
- 548 9. M. J. Gerdes, C. J. Sevinsky, A. Sood, S. Adak, M. O. Bello, A. Bordwell, A. Can, A.  
549 Corwin, S. Dinn, R. J. Filkins, D. Hollman, V. Kamath, S. Kaanumalle, K. Kenny, M.  
550 Larsen, M. Lazare, Q. Li, C. Lowes, C. C. McCulloch, E. McDonough, M. C. Montalto, Z.  
551 Pang, J. Rittscher, A. Santamaria-Pang, B. D. Sarachan, M. L. Seel, A. Seppo, K. Shaikh,  
552 Y. Sui, J. Zhang, F. Ginty, Highly multiplexed single-cell analysis of formalin-fixed,  
553 paraffin-embedded cancer tissue. *Proceedings of the National Academy of Sciences* **110**,  
554 11982 (2013).
- 555 10. C. Giesen, H. A. Wang, D. Schapiro, N. Zivanovic, A. Jacobs, B. Hattendorf, P. J.  
556 Schüffler, D. Grolimund, J. M. Buhmann, S. Brandt, Highly multiplexed imaging of tumor  
557 tissues with subcellular resolution by mass cytometry. *Nature methods* **11**, 417-422  
558 (2014).

- 559 11. L. Keren, M. Bosse, S. Thompson, T. Risom, K. Vijayaragavan, E. McCaffrey, D.  
560 Marquez, R. Angoshtari, N. F. Greenwald, H. Fienberg, MIBI-TOF: A multiplexed  
561 imaging platform relates cellular phenotypes and tissue structure. *Science advances* **5**,  
562 eaax5851 (2019).
- 563 12. L. M. Smith, N. L. Kelleher, M. Linial, D. Goodlett, P. Langridge-Smith, Y. Ah Goo, G.  
564 Safford, L. Bonilla\*, G. Kruppa, R. Zubarev, J. Rontree, J. Chamot-Rooke, J. Garavelli,  
565 A. Heck, J. Loo, D. Penque, M. Hornshaw, C. Hendrickson, L. Pasa-Tolic, C. Borchers,  
566 D. Chan, N. Young\*, J. Agar, C. Masselon, M. Gross\*, F. McLafferty, Y. Tsybin, Y. Ge,  
567 I. Sanders\*, J. Langridge, J. Whitelegge\*, A. Marshall, P. The Consortium for Top Down,  
568 Proteoform: a single term describing protein complexity. *Nature Methods* **10**, 186-187  
569 (2013).
- 570 13. R. Aebersold, J. N. Agar, I. J. Amster, M. S. Baker, C. R. Bertozzi, E. S. Boja, C. E.  
571 Costello, B. F. Cravatt, C. Fenselau, B. A. Garcia, Y. Ge, J. Gunawardena, R. C.  
572 Hendrickson, P. J. Hergenrother, C. G. Huber, A. R. Ivanov, O. N. Jensen, M. C. Jewett,  
573 N. L. Kelleher, L. L. Kiessling, N. J. Krogan, M. R. Larsen, J. A. Loo, R. R. Ogorzalek  
574 Loo, E. Lundberg, M. J. MacCoss, P. Mallick, V. K. Mootha, M. Mrksich, T. W. Muir, S.  
575 M. Patrie, J. J. Pesavento, S. J. Pitteri, H. Rodriguez, A. Saghatelian, W. Sandoval, H.  
576 Schlüter, S. Sechi, S. A. Slavoff, L. M. Smith, M. P. Snyder, P. M. Thomas, M. Uhlén, J.  
577 E. Van Eyk, M. Vidal, D. R. Walt, F. M. White, E. R. Williams, T. Wohlschlagler, V. H.  
578 Wysocki, N. A. Yates, N. L. Young, B. Zhang, How many human proteoforms are there?  
579 *Nature Chemical Biology* **14**, 206-214 (2018).
- 580 14. N. Siuti, N. L. Kelleher, Decoding protein modifications using top-down mass  
581 spectrometry. *Nature methods* **4**, 817-821 (2007).
- 582 15. D. P. Donnelly, C. M. Rawlins, C. J. DeHart, L. Fornelli, L. F. Schachner, Z. Lin, J. L.  
583 Lippens, K. C. Aluri, R. Sarin, B. Chen, Best practices and benchmarks for intact protein  
584 analysis for top-down mass spectrometry. *Nature methods* **16**, 587-594 (2019).
- 585 16. M. Wilhelm, J. Schlegl, H. Hahne, A. M. Gholami, M. Lieberenz, M. M. Savitski, E.  
586 Ziegler, L. Butzmann, S. Gessulat, H. Marx, T. Mathieson, S. Lemeer, K. Schnatbaum, U.  
587 Reimer, H. Wenschuh, M. Mollenhauer, J. Slotta-Huspenina, J.-H. Boese, M. Bantscheff,  
588 A. Gerstmair, F. Faerber, B. Kuster, Mass-spectrometry-based draft of the human  
589 proteome. *Nature* **509**, 582-587 (2014).
- 590 17. D. Unsihuay, D. M. Sanchez, J. Laskin, Quantitative Mass Spectrometry Imaging of  
591 Biological Systems. *Annual Review of Physical Chemistry* **72**, 307-329 (2021).
- 592 18. P. D. Piehowski, Y. Zhu, L. M. Bramer, K. G. Stratton, R. Zhao, D. J. Orton, R. J. Moore,  
593 J. Yuan, H. D. Mitchell, Y. Gao, Automated mass spectrometry imaging of over 2000  
594 proteins from tissue sections at 100- $\mu$ m spatial resolution. *Nature communications* **11**, 1-  
595 12 (2020).
- 596 19. E. H. Seeley, R. M. Caprioli, Molecular imaging of proteins in tissues by mass  
597 spectrometry. *Proc. Natl. Acad. Sci. U. S. A.* **105**, 18126-18131 (2008).
- 598 20. P. Chaurand, S. A. Schwartz, R. M. Caprioli, Profiling and Imaging Proteins in Tissue  
599 Sections by MS. *Anal. Chem.* **76**, 86 A-93 A (2004).
- 500 21. A. Van Remoortere, R. J. Van Zeijl, N. Van den Oever, J. Franck, R. Longuespée, M.  
501 Wisztorski, M. Salzet, A. M. Deelder, I. Fournier, L. A. McDonnell, MALDI imaging and  
502 profiling MS of higher mass proteins from tissue. *Journal of the American Society for*  
503 *Mass Spectrometry* **21**, 1922-1929 (2010).
- 504 22. H. Liu, M. Han, J. Li, L. Qin, L. Chen, Q. Hao, D. Jiang, D. Chen, Y. Ji, H. Han, A  
505 Caffeic Acid Matrix Improves In Situ Detection and Imaging of Proteins with High  
506 Molecular Weight Close to 200,000 Da in Tissues by Matrix-Assisted Laser  
507 Desorption/Ionization Mass Spectrometry Imaging. *Analytical Chemistry*, (2021).

- 508 23. B. D. Leinweber, G. Tsaprailis, T. J. Monks, S. S. Lau, Improved MALDI-TOF imaging  
509 yields increased protein signals at high molecular mass. *Journal of the American Society*  
510 *for Mass Spectrometry* **20**, 89-95 (2009).
- 511 24. S. Nicolardi, D. P. A. Kilgour, N. Dolezal, J. W. Drijfhout, M. Wührer, Y. E. M. van der  
512 Burgt, Evaluation of Sibling and Twin Fragment Ions Improves the Structural  
513 Characterization of Proteins by Top-Down MALDI In-Source Decay Mass Spectrometry.  
514 *Analytical Chemistry* **92**, 5871-5881 (2020).
- 515 25. J. S. Sampson, A. M. Hawkrige, D. C. Muddiman, Generation and Detection of  
516 Multiply-Charged Peptides and Proteins by Matrix-Assisted Laser Desorption  
517 Electrospray Ionization (MALDESI) Fourier Transform Ion Cyclotron Resonance Mass  
518 Spectrometry. *Journal of the American Society for Mass Spectrometry* **17**, 1712-1716  
519 (2006).
- 520 26. J. Laskin, I. Lanekoff, Ambient Mass Spectrometry Imaging Using Direct Liquid  
521 Extraction Techniques. *Analytical Chemistry* **88**, 52-73 (2016).
- 522 27. K. Y. Garza, C. L. Feider, D. R. Klein, J. A. Rosenberg, J. S. Brodbelt, L. S. Eberlin,  
523 Desorption electrospray ionization mass spectrometry imaging of proteins directly from  
524 biological tissue sections. *Analytical chemistry* **90**, 7785-7789 (2018).
- 525 28. R. L. Griffiths, J. W. Hughes, S. E. Abbatiello, M. W. Belford, I. B. Styles, H. J. Cooper,  
526 Comprehensive LESA mass spectrometry imaging of intact proteins by integration of  
527 cylindrical FAIMS. *Analytical chemistry* **92**, 2885-2890 (2020).
- 528 29. H. H. M. Yang, P. Su, P. M. Thomas, J. M. Camarillo, J. B. Greer, B. P. Early, R. T.  
529 Fellers, N. L. Kelleher, J. Laskin, Proteoform-selective imaging of tissues using mass  
530 spectrometry. *ChemRxiv*, (2021).
- 531 30. J. Laskin, B. S. Heath, P. J. Roach, L. Cazares, O. J. Semmes, Tissue imaging using  
532 nanospray desorption electrospray ionization mass spectrometry. *Analytical chemistry* **84**,  
533 141-148 (2012).
- 534 31. R. Yin, K. E. Burnum-Johnson, X. Sun, S. K. Dey, J. Laskin, High spatial resolution  
535 imaging of biological tissues using nanospray desorption electrospray ionization mass  
536 spectrometry. *Nature Protocols* **14**, 3445-3470 (2019).
- 537 32. C.-L. Chen, T.-H. Kuo, H.-H. Chung, P. Huang, L.-E. Lin, C.-C. Hsu, Remodeling  
538 nanoDESI platform with ion mobility spectrometry to expand protein coverage in  
539 cancerous tissue. *Journal of the American Society for Mass Spectrometry* **32**, 653-660  
540 (2021).
- 541 33. O. J. Hale, H. J. Cooper, Native Mass Spectrometry Imaging of Proteins and Protein  
542 Complexes by Nano-DESI. *Analytical chemistry* **93**, 4619-4627 (2021).
- 543 34. T. P. Wörner, J. Snijder, A. Bennett, M. Agbandje-McKenna, A. A. Makarov, A. J. Heck,  
544 Resolving heterogeneous macromolecular assemblies by Orbitrap-based single-particle  
545 charge detection mass spectrometry. *Nature methods* **17**, 395-398 (2020).
- 546 35. R. A. Zubarev, A. Makarov, Orbitrap mass spectrometry. *Anal. Chem.* **85**, 5288-5296  
547 (2013).
- 548 36. J. P. McGee, R. D. Melani, P. F. Yip, M. W. Senko, P. D. Compton, J. O. Kafader, N. L.  
549 Kelleher, Isotopic Resolution of Protein Complexes up to 466 kDa Using Individual Ion  
550 Mass Spectrometry. *Analytical Chemistry* **93**, 2723-2727 (2021).
- 551 37. J. O. Kafader, R. D. Melani, K. R. Durbin, B. Ikwuagwu, B. P. Early, R. T. Fellers, S. C.  
552 Beu, V. Zabrouskov, A. A. Makarov, J. T. Maze, Multiplexed mass spectrometry of  
553 individual ions improves measurement of proteoforms and their complexes. *Nature*  
554 *methods* **17**, 391-394 (2020).
- 555 38. D. Wang, B. Eraslan, T. Wieland, B. Hallström, T. Hopf, D. P. Zolg, J. Zecha, A.  
556 Asplund, L.-h. Li, C. Meng, M. Frejno, T. Schmidt, K. Schnatbaum, M. Wilhelm, F.  
557 Ponten, M. Uhlen, J. Gagneur, H. Hahne, B. Kuster, A deep proteome and transcriptome

- 558 abundance atlas of 29 healthy human tissues. *Molecular Systems Biology* **15**, e8503  
559 (2019).
- 560 39. J. O. Kafader, K. R. Durbin, R. D. Melani, B. J. Des Soye, L. F. Schachner, M. W. Senko,  
561 P. D. Compton, N. L. Kelleher, Individual Ion Mass Spectrometry Enhances the  
562 Sensitivity and Sequence Coverage of Top-Down Mass Spectrometry. *J. Proteome Res.*  
563 **19**, 1346-1350 (2020).
- 564 40. N. H. Patterson, E. K. Neumann, K. Sharman, J. Allen, R. Harris, A. B. Fogo, M. de  
565 Caestecker, R. M. Caprioli, R. Van de Plas, J. M. Spraggins, Autofluorescence  
566 microscopy as a label-free tool for renal histology and glomerular segmentation. *bioRxiv*,  
567 2021.2007.2016.452703 (2021).
- 568 41. J. Liu, Y. Zhang, Q. Li, Y. Wang, Transgelins: Cytoskeletal Associated Proteins  
569 Implicated in the Metastasis of Colorectal Cancer. *Frontiers in Cell and Developmental*  
570 *Biology* **8**, (2020).
- 571 42. N. L. Kelleher, A Cell-Based Approach to the Human Proteome Project. *Journal of The*  
572 *American Society for Mass Spectrometry* **23**, 1617-1624 (2012).
- 573 43. K. Gevaert, M. Goethals, L. Martens, J. Van Damme, A. Staes, G. R. Thomas, J.  
574 Vandekerckhove, Exploring proteomes and analyzing protein processing by mass  
575 spectrometric identification of sorted N-terminal peptides. *Nat. Biotechnol.* **21**, 566-569  
576 (2003).
- 577 44. J. Seo, J. Jeong, Y. M. Kim, N. Hwang, E. Paek, K. J. Lee, Strategy for comprehensive  
578 identification of post-translational modifications in cellular proteins, including low  
579 abundant modifications: application to glyceraldehyde-3-phosphate dehydrogenase. *J.*  
580 *Proteome Res.* **7**, 587-602 (2008).
- 581 45. X.-Y. Zhong, X.-M. Yuan, Y.-Y. Xu, M. Yin, W.-W. Yan, S.-W. Zou, L.-M. Wei, H.-J.  
582 Lu, Y.-P. Wang, Q.-Y. Lei, CARM1 Methylates GAPDH to Regulate Glucose  
583 Metabolism and Is Suppressed in Liver Cancer. *Cell Reports* **24**, 3207-3223 (2018).
- 584 46. K. Börner, S. A. Teichmann, E. M. Quardokus, J. C. Gee, K. Browne, D. Osumi-  
585 Sutherland, B. W. Herr, A. Bueckle, H. Paul, M. Haniffa, L. Jardine, A. Bernard, S.-L.  
586 Ding, J. A. Miller, S. Lin, M. K. Halushka, A. Boppana, T. A. Longacre, J. Hickey, Y.  
587 Lin, M. T. Valerius, Y. He, G. Pryhuber, X. Sun, M. Jorgensen, A. J. Radtke, C.  
588 Wasserfall, F. Ginty, J. Ho, J. Sunshine, R. T. Beuschel, M. Brusko, S. Lee, R. Malhotra,  
589 S. Jain, G. Weber, Anatomical structures, cell types and biomarkers of the Human  
590 Reference Atlas. *Nature Cell Biology* **23**, 1117-1128 (2021).
- 591 47. E. K. Neumann, N. H. Patterson, J. L. Allen, L. G. Migas, H. Yang, M. Brewer, D. M.  
592 Anderson, J. Harvey, D. B. Gutierrez, R. C. Harris, M. P. deCaestecker, A. B. Fogo, R.  
593 Van de Plas, R. M. Caprioli, J. M. Spraggins, Protocol for multimodal analysis of human  
594 kidney tissue by imaging mass spectrometry and CODEX multiplexed  
595 immunofluorescence. *STAR Protocols* **2**, 100747 (2021).
- 596 48. E. H. Seeley, S. R. Oppenheimer, D. Mi, P. Chaurand, R. M. Caprioli, Enhancement of  
597 protein sensitivity for MALDI imaging mass spectrometry after chemical treatment of  
598 tissue sections. *Journal of the American Society for Mass Spectrometry* **19**, 1069-1077  
599 (2008).
- 700 49. I. Lanekoff, B. S. Heath, A. Liyu, M. Thomas, J. P. Carson, J. Laskin, Automated  
701 Platform for High-Resolution Tissue Imaging Using Nanospray Desorption Electrospray  
702 Ionization Mass Spectrometry. *Analytical Chemistry* **84**, 8351-8356 (2012).
- 703 50. J. O. Kafader, S. C. Beu, B. P. Early, R. D. Melani, K. R. Durbin, V. Zabrouskov, A. A.  
704 Makarov, J. T. Maze, D. L. Shinholt, P. F. Yip, STORI plots enable accurate tracking of  
705 individual ion signals. *Journal of The American Society for Mass Spectrometry* **30**, 2200-  
706 2203 (2019).



- 707 51. Y. Zhou, B. Zhou, L. Pache, M. Chang, A. H. Khodabakhshi, O. Tanaseichuk, C. Benner,  
708 S. K. Chanda, Metascope provides a biologist-oriented resource for the analysis of  
709 systems-level datasets. *Nature Communications* **10**, 1523 (2019).
- 710 52. J. O. Kafader, R. D. Melani, K. R. Durbin, B. Ikwuagwu, B. P. Early, R. T. Fellers, S. C.  
711 Beu, V. Zabrouskov, A. A. Makarov, J. T. Maze, D. L. Shinholt, P. F. Yip, D. Tullman-  
712 Ercek, M. W. Senko, P. D. Compton, N. L. Kelleher, Multiplexed mass spectrometry of  
713 individual ions improves measurement of proteoforms and their complexes. *Nat. Methods*  
714 **17**, 391-394 (2020).  
715
